# Supplementary material for: A Bucket Graph–Based Labeling Algorithm with Application to Vehicle Routing
Source: Atypon-hosted journal article supplement (doi:10.1287/trsc.2020.0985), 2020-10-05
Supplement: trsc.2020.0985.sm1.pdf [file trsc.2020.0985.sm1.pdf]

# A Bucket Graph Based Labeling Algorithm with Application to Vehicle Routing: online appendix

Ruslan Sadykov

INRIA Bordeaux – Sud-Ouest 200 Avenue de la Veille Tour, 33405 Talence, France, ruslan.Sadykov@inria.fr

Eduardo Uchoa

Universidade Federal Fluminense - Engenharia de Produção  
Rua Passo da Pátria 156, Niterói - RJ - Brasil - 24210-240, uchoa@producao.uff.br

Artur Pessoa

Universidade Federal Fluminense - Engenharia de Produção  
Rua Passo da Pátria 156, Niterói - RJ - Brasil - 24210-240, artur@producao.uff.br

---

## Appendix. Detailed Results

In the Appendix, we present the detailed results for our BCP algorithm on all tested instances.

In the following tables, we show the instance name,  $n$  — the number of customers,  $m$  — the number of different vehicle types or the number of depots, when applicable, the initial upper bound, the “robust” dual bound (before adding non-robust cuts), the dual bound obtained in the root node, the root node time, the number of RICs at the end of the root node, the number of nodes, the total time, and the best solution value obtained by the algorithm. For instances solved before by another algorithm in the literature, we give the corresponding time (which takes into account the difference between the speed of the computers used), and the improvement factor (ratio of the running times of the literature algorithm and ours). In Tables 1–7, “Time PCDU” refers to the running time of the algorithm by Pecin et al. (2017). In Tables 14–15, “Time CM” refers to the running time of the algorithm by Contardo and Martinelli (2014). In the tables, \* near the best solution value indicates that its optimality was proven for the first time. If the best solution value is underlined, it improves on the best known solution value. All obtained solutions were proven to be optimal except when the total time is given with the “>” sign.

| Instance | Initial<br><i>UB</i> | Robust |        | Root   |      | Nodes<br>number | Total<br>time | Final<br><i>UB</i> | Time<br>PCDU | Improv.<br>factor |
|----------|----------------------|--------|--------|--------|------|-----------------|---------------|--------------------|--------------|-------------------|
|          |                      | bound  | bound  | time   | #R1C |                 |               |                    |              |                   |
| C203     | 588.8                | 588.7  | 588.7  | 27s    | 0    | 1               | 27s           | 588.7              | 6m05s        | 13.3              |
| C204     | 588.2                | 588.1  | 588.1  | 40s    | 0    | 1               | 40s           | 588.1              | 27m28s       | 40.9              |
| R202     | 1029.7               | 1022.2 | 1029.6 | 2m25s  | 72   | 1               | 2m25s         | 1029.6             | 5m16s        | 2.2               |
| R203     | 870.9                | 866.9  | 870.8  | 1m16s  | 17   | 1               | 1m16s         | 870.8              | 9m25s        | 7.4               |
| R204     | 731.4                | 724.9  | 731.3  | 3m04s  | 56   | 1               | 3m04s         | 731.3              | 24m55s       | 8.1               |
| R206     | 876.0                | 866.8  | 875.9  | 2m30s  | 51   | 1               | 2m30s         | 875.9              | 9m06s        | 3.6               |
| R207     | 794.1                | 790.1  | 794.0  | 1m43s  | 27   | 1               | 1m43s         | 794.0              | 12m08s       | 7.0               |
| R208     | 701.1                | 691.6  | 697.7  | 14m57s | 138  | 9               | 1h14m         | 701.0              | 17h48m       | 14.3              |
| R209     | 854.9                | 841.4  | 854.8  | 3m45s  | 105  | 1               | 3m45s         | 854.8              | 9m59s        | 2.7               |
| R210     | 900.6                | 889.4  | 900.5  | 4m34s  | 107  | 1               | 4m34s         | 900.5              | 12m09s       | 2.7               |
| R211     | 746.8                | 734.6  | 746.7  | 3m42s  | 110  | 1               | 3m42s         | 746.7              | 22m00s       | 5.9               |
| RC204    | 783.6                | 779.3  | 783.5  | 2m11s  | 15   | 1               | 2m11s         | 783.5              | 19m27s       | 8.9               |
| RC207    | 963.0                | 947.3  | 962.9  | 3m21s  | 91   | 1               | 3m21s         | 962.9              | 5m47s        | 1.7               |
| RC208    | 776.2                | 766.6  | 776.1  | 2m02s  | 36   | 1               | 2m02s         | 776.1              | 9m59s        | 4.9               |

Table 1: Detailed results for the hardest 100-customers Solomon VRPTW instances

| Instance | Initial<br><i>UB</i> | Robust |        | Root  |      | Nodes<br>number | Total<br>time | Final<br><i>UB</i> | Time<br>PCDU | Improv.<br>factor |
|----------|----------------------|--------|--------|-------|------|-----------------|---------------|--------------------|--------------|-------------------|
|          |                      | bound  | bound  | time  | #R1C |                 |               |                    |              |                   |
| C1.2.1   | 2698.7               | 2698.6 | 2698.6 | 8s    | 0    | 1               | 8s            | 2698.6             | 20s          | 2.2               |
| C1.2.2   | 2694.4               | 2694.3 | 2694.3 | 20s   | 0    | 1               | 20s           | 2694.3             | 44s          | 2.1               |
| C1.2.3   | 2675.9               | 2659.7 | 2675.8 | 4m39s | 66   | 1               | 4m39s         | 2675.8             | 10m26s       | 2.2               |
| C1.2.4   | 2625.7               | 2619.8 | 2625.6 | 6m51s | 42   | 1               | 6m51s         | 2625.6             | 5m40s        | 0.8               |
| C1.2.5   | 2695.0               | 2694.9 | 2694.9 | 11s   | 0    | 1               | 11s           | 2694.9             | 24s          | 2.1               |
| C1.2.6   | 2695.0               | 2694.9 | 2694.9 | 15s   | 0    | 1               | 15s           | 2694.9             | 26s          | 1.7               |
| C1.2.7   | 2695.0               | 2694.9 | 2694.9 | 18s   | 0    | 1               | 18s           | 2694.9             | 22s          | 1.2               |
| C1.2.8   | 2684.1               | 2683.7 | 2684.0 | 19s   | 0    | 1               | 19s           | 2684.0             | 28s          | 1.4               |
| C1.2.9   | 2639.7               | 2637.2 | 2639.6 | 54s   | 0    | 1               | 54s           | 2639.6             | 1m24s        | 1.5               |
| C1.2.10  | 2624.8               | 2620.2 | 2624.7 | 2m40s | 34   | 1               | 2m40s         | 2624.7             | 1m53s        | 0.7               |

Table 2: Detailed results for 200-customer Gehring and Homberger VRPTW instances of class C1

| Instance | Initial<br><i>UB</i> | Robust |        | Root   |      | Nodes<br>number | Total<br>time | Final<br><i>UB</i> | Time<br>PCDU | Improv.<br>factor |
|----------|----------------------|--------|--------|--------|------|-----------------|---------------|--------------------|--------------|-------------------|
|          |                      | bound  | bound  | time   | #R1C |                 |               |                    |              |                   |
| C2.2.1   | 1922.2               | 1915.0 | 1922.1 | 3m06s  | 70   | 1               | 3m06s         | 1922.1             | 14m20s       | 4.6               |
| C2.2.2   | 1851.5               | 1839.4 | 1851.4 | 6m57s  | 80   | 1               | 6m57s         | 1851.4             | 1h29m        | 12.9              |
| C2.2.3   | 1763.5               | 1737.0 | 1752.1 | 32m16s | 287  | 37              | 11h10m        | 1763.4*            | >96h         | >8.6              |
| C2.2.4   | 1695.1               | 1652.3 | 1663.2 | 28m59s | 187  | 355             | >60h          | 1695.1             | >96h         | –                 |
| C2.2.5   | 1869.7               | 1858.7 | 1869.6 | 3m57s  | 52   | 1               | 3m57s         | 1869.6             | 23m48s       | 6.0               |
| C2.2.6   | 1844.9               | 1836.6 | 1844.8 | 3m22s  | 23   | 1               | 3m22s         | 1844.8             | 34m03s       | 10.1              |
| C2.2.7   | 1842.3               | 1834.9 | 1842.2 | 3m03s  | 21   | 1               | 3m03s         | 1842.2             | 44m33s       | 14.6              |
| C2.2.8   | 1813.8               | 1801.3 | 1813.7 | 3m11s  | 12   | 1               | 3m11s         | 1813.7             | 42m22s       | 13.3              |
| C2.2.9   | 1815.1               | 1795.0 | 1815.0 | 9m17s  | 101  | 1               | 9m17s         | 1815.0             | 2h01m        | 13.1              |
| C2.2.10  | 1791.3               | 1765.7 | 1791.2 | 13m04s | 96   | 1               | 13m04s        | 1791.2             | 2h56m        | 13.5              |

Table 3: Detailed results for 200-customer Gehring and Homberger VRPTW instances of class C2

| Instance | Initial<br><i>UB</i> | Robust |        | Root   |      | Nodes<br>number | Total<br>time | Final<br><i>UB</i> | Time<br>PCDU | Improv.<br>factor |
|----------|----------------------|--------|--------|--------|------|-----------------|---------------|--------------------|--------------|-------------------|
|          |                      | bound  | bound  | time   | #R1C |                 |               |                    |              |                   |
| R1_2.1   | 4667.3               | 4655.0 | 4667.2 | 14s    | 22   | 1               | 14s           | 4667.2             | 59s          | 4.0               |
| R1_2.2   | 3920.0               | 3907.2 | 3919.9 | 37s    | 75   | 1               | 37s           | 3919.9             | 2m42s        | 4.3               |
| R1_2.3   | 3374.0               | 3320.3 | 3352.5 | 13m27s | 502  | 693             | 17h01m        | 3373.9             | 25h56m       | 1.5               |
| R1_2.4   | 3047.7               | 3001.5 | 3035.3 | 23m03s | 635  | 267             | 10h45m        | 3047.6             | 5h00m        | 0.5               |
| R1_2.5   | 4053.3               | 4007.6 | 4044.8 | 3m21s  | 290  | 9               | 10m51s        | 4053.2             | 7m25s        | 0.7               |
| R1_2.6   | 3559.3               | 3493.4 | 3545.3 | 11m16s | 559  | 71              | 2h00m         | 3559.1             | 2h00m        | 1.0               |
| R1_2.7   | 3142.0               | 3099.2 | 3141.9 | 9m27s  | 335  | 1               | 9m27s         | 3141.9             | 16m42s       | 1.8               |
| R1_2.8   | 2938.5               | 2902.2 | 2933.9 | 19m02s | 436  | 5               | 27m38s        | 2938.4             | 41m39s       | 1.5               |
| R1_2.9   | 3734.8               | 3678.3 | 3726.4 | 6m23s  | 443  | 7               | 14m43s        | 3734.7             | 12m51s       | 0.9               |
| R1_2.10  | 3293.2               | 3244.9 | 3278.2 | 8m35s  | 489  | 49              | 1h47m         | 3293.1             | 1h23m        | 0.8               |

Table 4: Detailed results for 200-customer Gehring and Homberger VRPTW instances of class R1

| Instance | Initial<br><i>UB</i> | Robust |        | Root   |      | Nodes<br>number | Total<br>time | Final<br><i>UB</i> | Time<br>PCDU | Improv.<br>factor |
|----------|----------------------|--------|--------|--------|------|-----------------|---------------|--------------------|--------------|-------------------|
|          |                      | bound  | bound  | time   | #R1C |                 |               |                    |              |                   |
| R2_2.1   | 3468.1               | 3462.5 | 3468.0 | 2m20s  | 19   | 1               | 2m20s         | 3468.0             | 34m43s       | 14.9              |
| R2_2.2   | 3008.3               | 3000.9 | 3008.2 | 7m33s  | 69   | 1               | 7m33s         | 3008.2             | 1h07m        | 9.0               |
| R2_2.3   | 2537.6               | 2516.3 | 2537.5 | 33m26s | 181  | 1               | 33m26s        | 2537.5             | 5h50m        | 10.5              |
| R2_2.4   | 1928.6               | 1918.3 | 1924.9 | 33m39s | 94   | 33              | 3h59m         | 1928.5*            | >96h         | >24.0             |
| R2_2.5   | 3061.2               | 3029.4 | 3061.1 | 21m41s | 123  | 1               | 21m41s        | 3061.1             | 1h45m        | 4.9               |
| R2_2.6   | 2675.5               | 2644.9 | 2675.2 | 37m20s | 249  | 3               | 50m39s        | 2675.4             | 4h04m        | 4.8               |
| R2_2.7   | 2304.8               | 2277.8 | 2304.7 | 1h48m  | 335  | 1               | 1h48m         | 2304.7             | 12h16m       | 6.8               |
| R2_2.8   | 1842.5               | 1808.9 | 1832.1 | 1h41m  | 393  | 19              | 11h47m        | 1842.4*            | >96h         | >8.1              |
| R2_2.9   | 2843.4               | 2824.3 | 2843.3 | 12m37s | 110  | 1               | 12m37s        | 2843.3             | 1h23m        | 6.6               |
| R2_2.10  | 2549.5               | 2528.7 | 2545.4 | 15m33s | 202  | 3               | 24m04s        | 2549.4             | 3h14m        | 8.1               |

Table 5: Detailed results for 200-customer Gehring and Homberger VRPTW instances of class R2

| Instance | Initial<br><i>UB</i> | Robust |        | Root   |      | Nodes<br>number | Total<br>time | Final<br><i>UB</i> | Time<br>PCDU | Improv.<br>factor |
|----------|----------------------|--------|--------|--------|------|-----------------|---------------|--------------------|--------------|-------------------|
|          |                      | bound  | bound  | time   | #R1C |                 |               |                    |              |                   |
| RC1_2.1  | 3517.0               | 3459.6 | 3498.7 | 4m26s  | 338  | 43              | 40m29s        | 3516.9             | 42m10s       | 1.0               |
| RC1_2.2  | 3221.7               | 3177.8 | 3206.1 | 11m52s | 522  | 17              | 33m38s        | 3221.6             | 3h10m        | 5.7               |
| RC1_2.3  | 3001.5               | 2952.1 | 2982.9 | 22m40s | 630  | 187             | 14h41m        | 3001.4             | 18h15m       | 1.2               |
| RC1_2.4  | 2845.3               | 2814.4 | 2831.0 | 26m52s | 361  | 41              | 4h58m         | 2845.2             | 6h23m        | 1.3               |
| RC1_2.5  | 3325.7               | 3272.9 | 3312.7 | 49m59s | 678  | 15              | 1h22m         | 3325.6             | 2h23m        | 1.7               |
| RC1_2.6  | 3300.8               | 3255.3 | 3295.1 | 12m30s | 468  | 5               | 16m35s        | 3300.7             | 26m46s       | 1.6               |
| RC1_2.7  | 3177.9               | 3114.7 | 3151.8 | 17m14s | 554  | 109             | 10h46m        | 3177.8             | 52h20m       | 4.9               |
| RC1_2.8  | 3060.1               | 3022.6 | 3047.4 | 19m03s | 614  | 5               | 49m56s        | 3060.0             | 2h50m        | 3.4               |
| RC1_2.9  | 3074.9               | 3006.6 | 3035.6 | 16m42s | 464  | 493             | >60h          | 3074.9             | >96h         | —                 |
| RC1_2.10 | 2990.6               | 2938.7 | 2966.4 | 24m40s | 583  | 683             | >60h          | 2990.6             | >96h         | —                 |

Table 6: Detailed results for 200-customer Gehring and Homberger VRPTW instances of class RC1

| Instance | Initial<br><i>UB</i> | Robust |       | Root |      | Nodes<br>number | Total<br>time | Final<br><i>UB</i> | Time<br>PCDU | Improv.<br>factor |
|----------|----------------------|--------|-------|------|------|-----------------|---------------|--------------------|--------------|-------------------|
|          |                      | bound  | bound | time | #R1C |                 |               |                    |              |                   |

|          |        |        |        |        |     |     |        |         |        |      |
|----------|--------|--------|--------|--------|-----|-----|--------|---------|--------|------|
| RC2.2.1  | 2797.5 | 2789.4 | 2797.4 | 4m11s  | 38  | 1   | 4m11s  | 2797.4  | 35m49s | 8.6  |
| RC2.2.2  | 2481.7 | 2469.5 | 2477.0 | 19m21s | 183 | 3   | 39m25s | 2481.6  | 4h50m  | 7.4  |
| RC2.2.3  | 2227.8 | 2204.7 | 2227.7 | 1h54m  | 308 | 1   | 1h54m  | 2227.7  | 13h32m | 7.1  |
| RC2.2.4  | 1854.9 | 1839.7 | 1848.3 | 1h33m  | 196 | 31  | 10h52m | 1854.8* | >96h   | >8.8 |
| RC2.2.5  | 2493.6 | 2479.0 | 2491.4 | 13m36s | 142 | 1   | 13m36s | 2491.4  | 1h25m  | 6.3  |
| RC2.2.6  | 2496.4 | 2475.6 | 2495.1 | 14m09s | 83  | 1   | 14m09s | 2495.1  | 1h33m  | 6.6  |
| RC2.2.7  | 2287.8 | 2271.2 | 2279.0 | 17m22s | 98  | 11  | 59m07s | 2287.7  | 8h11m  | 8.3  |
| RC2.2.8  | 2151.3 | 2140.7 | 2151.2 | 29m09s | 92  | 1   | 29m09s | 2151.2  | 23h05m | 47.5 |
| RC2.2.9  | 2086.7 | 2056.5 | 2071.1 | 1h54m  | 240 | 109 | 59h29m | 2086.6* | >96h   | >1.6 |
| RC2.2.10 | 1989.3 | 1953.2 | 1955.8 | 51m23s | 12  | 201 | >60h   | 1989.2  | >96h   | —    |

Table 7: Detailed results for 200-customer Gehring and Homberger VRPTW instances of class RC2

| Instance | Initial<br><i>UB</i> | Robust |        | Root   |      | Nodes<br>number | Total<br>time | Final<br><i>UB</i>  |
|----------|----------------------|--------|--------|--------|------|-----------------|---------------|---------------------|
|          |                      | bound  | bound  | time   | #R1C |                 |               |                     |
| C1.4.1   | 7138.9               | 7138.8 | 7138.8 | 1m34s  | 0    | 1               | 1m34s         | 7138.8 <sup>c</sup> |
| C1.4.2   | 7113.2               | 7095.0 | 7102.2 | 6m13s  | 79   | 3               | 7m17s         | 7113.2*             |
| C1.4.3   | 6930.0               | 6919.8 | 6929.9 | 12m51s | 81   | 1               | 12m51s        | 6929.9*             |
| C1.4.4   | 6777.8               | 6769.6 | 6777.7 | 45m22s | 118  | 1               | 45m22s        | 6777.7*             |
| C1.4.5   | 7138.9               | 7138.8 | 7138.8 | 1m58s  | 0    | 1               | 1m58s         | 7138.8*             |
| C1.4.6   | 7140.2               | 7140.1 | 7140.1 | 2m11s  | 0    | 1               | 2m11s         | 7140.1*             |
| C1.4.7   | 7136.3               | 7135.9 | 7136.2 | 2m27s  | 0    | 1               | 2m27s         | 7136.2*             |
| C1.4.8   | 7107.1               | 7030.0 | 7071.2 | 13m02s | 277  | 61              | 2h07m         | 7083.0*             |
| C1.4.9   | 6927.9               | 6888.3 | 6927.8 | 22m43s | 355  | 1               | 22m43s        | 6927.8*             |
| C1.4.10  | 6825.5               | 6798.8 | 6819.2 | 44m59s | 347  | 13              | 1h02m         | 6825.4*             |

<sup>c</sup> this instance has been solved before by Kallehauge, Larsen, and Madsen (2006)

Table 8: Detailed results for 400-customer Gehring and Homberger VRPTW instances of class C1

| Instance | Initial<br><i>UB</i> | Robust |        | Root   |      | Nodes<br>number | Total<br>time | Final<br><i>UB</i> |
|----------|----------------------|--------|--------|--------|------|-----------------|---------------|--------------------|
|          |                      | bound  | bound  | time   | #R1C |                 |               |                    |
| C2.4.1   | 4100.4               | 4088.4 | 4100.3 | 15m08s | 35   | 1               | 15m08s        | 4100.3*            |
| C2.4.2   | 3914.2               | 3897.5 | 3914.1 | 9h39m  | 283  | 1               | 9h39m         | 3914.1*            |
| C2.4.3   | 3755.3               | 3722.7 | 3740.8 | 60h00m | 566  | 1               | >60h          | 3755.3             |
| C2.4.4   | 3524.1               | 3483.3 | 3498.4 | 3h00m  | 288  | 11              | >60h          | 3524.1             |
| C2.4.5   | 3923.3               | 3919.7 | 3923.2 | 23m01s | 58   | 1               | 23m01s        | 3923.2*            |
| C2.4.6   | 3860.2               | 3843.8 | 3860.1 | 39m33s | 99   | 1               | 39m33s        | 3860.1*            |
| C2.4.7   | 3871.0               | 3861.6 | 3870.9 | 29m47s | 82   | 1               | 29m47s        | 3870.9*            |
| C2.4.8   | 3773.8               | 3743.4 | 3770.6 | 1h11m  | 397  | 9               | 4h29m         | 3773.7*            |
| C2.4.9   | 3843.8               | 3782.0 | 3815.9 | 4h09m  | 542  | 15              | >60h          | 3843.8             |
| C2.4.10  | 3665.2               | 3616.9 | 3656.2 | 2h33m  | 682  | 73              | >60h          | 3665.1             |

Table 9: Detailed results for 400-customer Gehring and Homberger VRPTW instances of class C2

| Instance | Initial<br><i>UB</i> | Robust |       | Root |      | Nodes<br>number | Total<br>time | Final<br><i>UB</i> |
|----------|----------------------|--------|-------|------|------|-----------------|---------------|--------------------|
|          |                      | bound  | bound | time | #R1C |                 |               |                    |

|         |         |         |         |        |      |      |        |          |
|---------|---------|---------|---------|--------|------|------|--------|----------|
| R1.4.1  | 10313.9 | 10243.5 | 10284.1 | 4m00s  | 181  | 25   | 16m48s | 10305.8* |
| R1.4.2  | 8876.0  | 8776.2  | 8834.3  | 17m52s | 534  | 1683 | >60h   | 8876.0   |
| R1.4.3  | 7794.8  | 7673.7  | 7732.2  | 54m14s | 658  | 327  | >60h   | 7794.8   |
| R1.4.4  | 7281.8  | 7182.4  | 7239.2  | 2h06m  | 1095 | 123  | >60h   | 7281.8   |
| R1.4.5  | 9188.7  | 9082.3  | 9145.8  | 6m35s  | 355  | 2393 | >60h   | 9188.7   |
| R1.4.6  | 8366.6  | 8257.8  | 8314.1  | 28m04s | 596  | 1139 | >60h   | 8366.6   |
| R1.4.7  | 7609.1  | 7489.2  | 7558.6  | 1h25m  | 1020 | 185  | >60h   | 7609.1   |
| R1.4.8  | 7253.5  | 7148.5  | 7200.0  | 1h57m  | 967  | 147  | >60h   | 7253.5   |
| R1.4.9  | 8674.8  | 8545.7  | 8618.4  | 13m45s | 611  | 1265 | >60h   | 8674.8   |
| R1.4.10 | 8088.9  | 7944.9  | 8024.2  | 31m57s | 782  | 611  | >60h   | 8088.9   |

Table 10: Detailed results for 400-customer Gehring and Homberger VRPTW instances of class R1

| Instance | Initial<br><i>UB</i> | Robust<br>bound | Root   |              | Nodes<br>number | Total<br>time | Final<br><i>UB</i> |         |
|----------|----------------------|-----------------|--------|--------------|-----------------|---------------|--------------------|---------|
|          |                      |                 | bound  | time<br>#R1C |                 |               |                    |         |
| R2.4.1   | 7522.1               | 7485.3          | 7520.7 | 42m42s       | 96              | 1             | 42m42s             | 7520.7* |
| R2.4.2   | 6482.9               | 6466.3          | 6482.8 | 1h33m        | 127             | 1             | 1h33m              | 6482.8* |
| R2.4.3   | 5373.0               | 5349.3          | 5372.9 | 6h18m        | 333             | 1             | 6h18m              | 5372.9* |
| R2.4.4   | 4213.8               | 4144.1          | 4169.8 | 12h06m       | 1131            | 15            | >60h               | 4213.8  |
| R2.4.5   | 6572.1               | 6498.0          | 6559.6 | 10h06m       | 450             | 3             | >60h               | 6572.1  |
| R2.4.6   | 5814.6               | 5763.1          | 5811.8 | 24h11m       | 1423            | 3             | >60h               | 5814.6  |
| R2.4.7   | 4893.6               | 4843.2          | 4878.4 | 15h39m       | 1492            | 11            | >60h               | 4893.6  |
| R2.4.8   | 4001.1               | 3897.7          | 3913.9 | 20h11m       | 444             | 9             | >60h               | 4001.1  |
| R2.4.9   | 6070.3               | 6001.5          | 6059.4 | 3h44m        | 704             | 25            | 58h55m             | 6067.8* |
| R2.4.10  | 5665.1               | 5561.6          | 5619.5 | 4h09m        | 758             | 21            | >60h               | 5665.1  |

Table 11: Detailed results for 400-customer Gehring and Homberger VRPTW instances of class R2

| Instance | Initial<br><i>UB</i> | Robust<br>bound | Root   |              | Nodes<br>number | Total<br>time | Final<br><i>UB</i> |        |
|----------|----------------------|-----------------|--------|--------------|-----------------|---------------|--------------------|--------|
|          |                      |                 | bound  | time<br>#R1C |                 |               |                    |        |
| RC1.4.1  | 8523.0               | 8368.9          | 8470.0 | 16m38s       | 762             | 667           | >60h               | 8523.0 |
| RC1.4.2  | 7887.2               | 7770.3          | 7843.0 | 49m29s       | 1123            | 197           | >60h               | 7887.2 |
| RC1.4.3  | 7525.2               | 7423.3          | 7444.7 | 44m01s       | 252             | 269           | >60h               | 7525.2 |
| RC1.4.4  | 7295.3               | 7207.8          | 7242.9 | 1h43m        | 805             | 37            | >60h               | 7295.3 |
| RC1.4.5  | 8152.4               | 8033.8          | 8101.5 | 44m15s       | 1115            | 37            | >60h               | 8152.4 |
| RC1.4.6  | 8148.6               | 8005.9          | 8089.7 | 47m39s       | 1192            | 127           | >60h               | 8148.6 |
| RC1.4.7  | 7937.0               | 7830.6          | 7878.9 | 48m09s       | 841             | 235           | >60h               | 7937.0 |
| RC1.4.8  | 7765.8               | 7639.3          | 7679.0 | 42m19s       | 574             | 201           | >60h               | 7765.8 |
| RC1.4.9  | 7724.4               | 7604.8          | 7639.1 | 48m15s       | 455             | 209           | >60h               | 7724.4 |
| RC1.4.10 | 7583.2               | 7479.2          | 7521.6 | 1h42m        | 931             | 33            | >60h               | 7583.2 |

Table 12: Detailed results for 400-customer Gehring and Homberger VRPTW instances of class RC1

| Instance | Initial<br><i>UB</i> | Robust<br>bound | Root  |              | Nodes<br>number | Total<br>time | Final<br><i>UB</i> |
|----------|----------------------|-----------------|-------|--------------|-----------------|---------------|--------------------|
|          |                      |                 | bound | time<br>#R1C |                 |               |                    |

|          |        |        |        |        |      |    |        |         |
|----------|--------|--------|--------|--------|------|----|--------|---------|
| RC2.4.1  | 6147.4 | 6120.1 | 6146.6 | 3h18m  | 238  | 3  | 3h37m  | 6147.3* |
| RC2.4.2  | 5407.6 | 5389.5 | 5407.5 | 4h06m  | 458  | 1  | 4h06m  | 5407.5* |
| RC2.4.3  | 4573.1 | 4549.6 | 4573.0 | 35h25m | 1294 | 1  | 35h25m | 4573.0* |
| RC2.4.4  | 3598.0 | 3535.9 | 3535.9 | 8h25m  | 0    | 5  | >60h   | 3598.0  |
| RC2.4.5  | 5396.7 | 5363.0 | 5388.6 | 4h47m  | 466  | 7  | >60h   | 5396.7  |
| RC2.4.6  | 5332.1 | 5270.9 | 5308.5 | 9h04m  | 738  | 3  | >60h   | 5332.1  |
| RC2.4.7  | 4987.9 | 4944.9 | 4968.6 | 6h08m  | 453  | 19 | >60h   | 4987.9  |
| RC2.4.8  | 4703.2 | 4602.0 | 4618.7 | 4h53m  | 216  | 31 | >60h   | 4703.2  |
| RC2.4.9  | 4519.1 | 4448.9 | 4457.0 | 5h35m  | 278  | 21 | >60h   | 4519.1  |
| RC2.4.10 | 4252.4 | 4157.0 | 4157.0 | 2h11m  | 0    | 83 | >60h   | 4252.4  |

Table 13: Detailed results for 400-customer Gehring and Homberger VRPTW instances of class RC2

| Inst. | $n$ | $m$ | Initial<br>$UB$ | Robust<br>bound | Root    |        | Nod.<br>num. | Total<br>time | Final<br>$UB$ | Time<br>CM             | Impr.<br>factor |      |
|-------|-----|-----|-----------------|-----------------|---------|--------|--------------|---------------|---------------|------------------------|-----------------|------|
|       |     |     |                 |                 | bound   | time   |              |               |               |                        |                 | #RIC |
| p08   | 249 | 2   | 4372.90         | 4294.01         | 4347.67 | 49m01s | 567          | 29            | 5h43m         | 4372.78 <sup>*,a</sup> | —               | —    |
| p09   | 249 | 3   | 3858.80         | 3798.47         | 3849.96 | 1h34m  | 650          | 19            | 2h25m         | 3858.66*               | —               | —    |
| p10   | 249 | 4   | 3631.30         | 3582.48         | 3626.26 | 37m26s | 522          | 3             | 41m46s        | 3631.11 <sup>*,a</sup> | —               | —    |
| p11   | 249 | 5   | 3546.20         | 3488.64         | 3540.43 | 44m15s | 597          | 3             | 49m46s        | 3546.06 <sup>*,a</sup> | —               | —    |
| p13   | 80  | 2   | 1319.10         | 1318.95         | 1318.95 | 1s     | 0            | 1             | 1s            | 1318.95                | 31s             | 17.5 |
| p14   | 80  | 2   | 1360.30         | 1360.12         | 1360.12 | 1s     | 0            | 1             | 1s            | 1360.12                | 38s             | 20.5 |
| p16   | 160 | 4   | 2572.40         | 2572.23         | 2572.23 | 12s    | 0            | 1             | 12s           | 2572.23                | 8m27s           | 39.7 |
| p17   | 160 | 4   | 2709.20         | 2709.09         | 2709.09 | 55s    | 0            | 1             | 55s           | 2709.09                | 8m07s           | 8.8  |
| p19   | 240 | 6   | 3827.20         | 3822.92         | 3827.06 | 1m25s  | 0            | 1             | 1m25s         | 3827.06                | 37m15s          | 26.3 |
| p20   | 240 | 6   | 4058.20         | 4058.07         | 4058.07 | 2m30s  | 0            | 1             | 2m30s         | 4058.07                | 38m47s          | 15.5 |
| p22   | 360 | 9   | 5702.30         | 5693.87         | 5702.16 | 2m28s  | 0            | 1             | 2m28s         | 5702.16*               | —               | —    |
| p23   | 360 | 9   | 6078.90         | 6078.75         | 6078.75 | 5m52s  | 0            | 1             | 5m52s         | 6078.75*               | —               | —    |

<sup>a</sup> a solution with smaller value is claimed in Escobar et al. (2014), however the authors were not able to communicate it to us

Table 14: Detailed results for Cordeau et al. MDVRP instances of class “p”

| Inst. | $n$ | $m$ | Initial<br>$UB$ | Robust<br>bound | Root    |        | Nod.<br>num. | Total<br>time | Final<br>$UB$ | Time<br>CM | Impr.<br>factor |         |
|-------|-----|-----|-----------------|-----------------|---------|--------|--------------|---------------|---------------|------------|-----------------|---------|
|       |     |     |                 |                 | bound   | time   |              |               |               |            |                 | #RIC    |
| pr01  | 48  | 4   | 861.40          | 861.32          | 861.32  | 3s     | 0            | 1             | 3s            | 861.32     | 0s              | 0.03    |
| pr02  | 96  | 4   | 1307.50         | 1287.52         | 1307.34 | 4m18s  | 110          | 1             | 4m18s         | 1307.34*   | >75h            | >1042.8 |
| pr03  | 144 | 4   | 1803.90         | 1773.42         | 1803.80 | 10m22s | 185          | 1             | 10m22s        | 1803.80    | 31h11m          | 180.5   |
| pr04  | 192 | 4   | 2058.50         | 2029.87         | 2058.31 | 22m52s | 327          | 1             | 22m52s        | 2058.31*   | >75h            | >196.7  |
| pr05  | 240 | 4   | 2331.30         | 2293.32         | 2318.80 | 1h14m  | 628          | 27            | 6h19m         | 2331.20*   | —               | —       |
| pr06  | 288 | 4   | 2676.40         | 2635.08         | 2662.92 | 1h18m  | 522          | 21            | 6h39m         | 2676.30*   | —               | —       |
| pr07  | 72  | 6   | 1089.70         | 1085.59         | 1089.56 | 17s    | 0            | 1             | 17s           | 1089.56    | 18m28s          | 63.8    |
| pr08  | 144 | 6   | 1665.00         | 1640.18         | 1664.85 | 8m42s  | 105          | 1             | 8m42s         | 1664.85    | 11h53m          | 82.0    |
| pr09  | 216 | 6   | 2133.30         | 2109.20         | 2133.20 | 23m06s | 242          | 1             | 23m06s        | 2133.20*   | >75h            | >194.8  |
| pr10  | 288 | 6   | 2868.40         | 2818.03         | 2850.68 | 1h40m  | 583          | 77            | 24h06m        | 2867.26*   | —               | —       |

Table 15: Detailed results for Cordeau et al. MDVRP instances of class “pr”

| Instance | $n$ | $m$ | Initial<br>$UB$ | Robust  |         | Root   |      | Nodes<br>number | Total<br>time | Final<br>$UB$ |
|----------|-----|-----|-----------------|---------|---------|--------|------|-----------------|---------------|---------------|
|          |     |     |                 | bound   | bound   | time   | #R1C |                 |               |               |
| pr01     | 48  | 4   | 1380.90         | 1377.09 | 1380.77 | 19s    | 0    | 1               | 19s           | 1380.77*      |
| pr02     | 96  | 4   | 2304.00         | 2283.37 | 2303.89 | 2m51s  | 23   | 1               | 2m51s         | 2303.89*      |
| pr03     | 144 | 4   | 2575.50         | 2538.93 | 2565.67 | 19m01s | 248  | 7               | 24m12s        | 2574.56*      |
| pr04     | 192 | 4   | 3450.00         | 3396.73 | 3432.33 | 42m22s | 453  | 9               | 1h47m         | 3449.84*      |
| pr05     | 240 | 4   | 4377.50         | 4288.21 | 4332.64 | 46m35s | 442  | 217             | >60h          | 4375.67       |
| pr06     | 288 | 4   | 4422.20         | 4326.08 | 4329.25 | 21m45s | 21   | 353             | >60h          | 4421.95       |
| pr07     | 72  | 6   | 1890.00         | 1868.89 | 1889.82 | 6m30s  | 0    | 1               | 6m30s         | 1889.82*      |
| pr08     | 144 | 6   | 2971.20         | 2933.81 | 2962.61 | 25m44s | 222  | 7               | 32m37s        | 2969.92*      |
| pr09     | 216 | 6   | 3536.30         | 3511.38 | 3527.76 | 1h00m  | 239  | 5               | 1h03m         | 3536.20*      |
| pr10     | 288 | 6   | 4639.80         | 4537.82 | 4559.48 | 48m34s | 246  | 297             | >60h          | 4639.80       |

Table 16: Detailed results for Cordeau and Laporte SDVRP instances

| Instance | $n$ | Initial<br>$UB$ | Robust  |         | Root   |      | Nodes<br>number | Total<br>time | Final<br>$UB$         |
|----------|-----|-----------------|---------|---------|--------|------|-----------------|---------------|-----------------------|
|          |     |                 | bound   | bound   | time   | #R1C |                 |               |                       |
| CMT6     | 50  | 555.60          | 540.52  | 555.43  | 7s     | 49   | 1               | 7s            | 555.43*               |
| CMT7     | 75  | 909.80          | 898.95  | 909.68  | 4s     | 35   | 1               | 4s            | 909.68*               |
| CMT8     | 100 | 866.10          | 842.15  | 857.86  | 6m48s  | 319  | 17              | 54m47s        | 865.94*               |
| CMT9     | 150 | 1162.70         | 1133.47 | 1153.37 | 7m58s  | 429  | 447             | 13h48m        | 1162.55* <sup>b</sup> |
| CMT10    | 199 | 1396.00         | 1368.79 | 1387.35 | 16m22s | 579  | 443             | 17h29m        | 1395.85*              |
| CMT13    | 120 | 1541.30         | 1458.00 | 1475.23 | 10m39s | 281  | 149             | >60h          | 1541.30               |
| CMT14    | 100 | 866.50          | 851.24  | 866.37  | 45m22s | 318  | 1               | 45m22s        | 866.37*               |

<sup>b</sup> solution with value 1158.41, claimed in Dell'Amico et al. (2016), is infeasible (different rounding convention was used)

Table 17: Detailed results for Christofides et al. DCVRP instances

| Instance | $n$ | $m$ | Initial<br>$UB$ | Robust   |          | Root   |      | Nodes<br>number | Total<br>time | Final<br>$UB$ |
|----------|-----|-----|-----------------|----------|----------|--------|------|-----------------|---------------|---------------|
|          |     |     |                 | bound    | bound    | time   | #R1C |                 |               |               |
| DLP_75   | 20  | 3   | 453             | 448.43   | 452.85   | 0s     | 6    | 1               | 0s            | 452.85*       |
| DLP_92   | 35  | 3   | 565             | 553.05   | 559.82   | 4m58s  | 110  | 5               | 9m39s         | 564.39*       |
| DLP_93   | 39  | 3   | 1037            | 1011.57  | 1023.69  | 12s    | 46   | 11              | 1m39s         | 1036.99*      |
| DLP_94   | 46  | 5   | 1379            | 1369.07  | 1378.25  | 17s    | 42   | 1               | 17s           | 1378.25*      |
| DLP_55   | 56  | 3   | 10245           | 10134.23 | 10244.34 | 38s    | 29   | 1               | 38s           | 10244.34*     |
| DLP_52   | 59  | 3   | 4028            | 3912.72  | 3931.40  | 2m59s  | 53   | 11              | 12m57s        | 4027.27*      |
| DLP_10   | 69  | 4   | 2108            | 2048.67  | 2060.75  | 3m00s  | 77   | 13              | 18m38s        | 2107.55*      |
| DLP_39   | 77  | 5   | 2922            | 2874.88  | 2902.55  | 6m03s  | 302  | 25              | 28m47s        | 2918.87*      |
| DLP_70   | 78  | 4   | 6685            | 6561.07  | 6659.88  | 5m02s  | 252  | 3               | 13m53s        | 6684.56*      |
| DLP_82   | 79  | 3   | 4767            | 4630.03  | 4648.96  | 1m10s  | 107  | 123             | 1h12m         | 4718.27*      |
| DLP_08   | 84  | 3   | 4592            | 4569.97  | 4591.75  | 2s     | 0    | 1               | 2s            | 4591.75*      |
| DLP_36   | 85  | 6   | 5685            | 5610.15  | 5684.62  | 1m29s  | 115  | 1               | 1m29s         | 5684.62*      |
| DLP_43   | 86  | 7   | 8738            | 8686.41  | 8737.02  | 43s    | 31   | 1               | 43s           | 8737.02*      |
| DLP_01   | 92  | 4   | 9211            | 8974.44  | 9081.63  | 10m33s | 158  | 3               | 24m37s        | 9210.14*      |
| DLP_11   | 95  | 4   | 3368            | 3288.08  | 3296.82  | 3m19s  | 31   | 9               | 20m54s        | 3367.41*      |

Table 18: Detailed results for Duhamel et al. HFVRP instances with up to 100 customers

| Instance | $n$ | $m$ | Initial<br>$UB$ | Robust<br>bound | Root     |        |      | Nodes<br>number | Total<br>time | Final<br>$UB$ |
|----------|-----|-----|-----------------|-----------------|----------|--------|------|-----------------|---------------|---------------|
|          |     |     |                 |                 | bound    | time   | #R1C |                 |               |               |
| DLP_90   | 102 | 4   | 2347            | 2249.36         | 2257.75  | 5m05s  | 136  | 655             | 40h29m        | 2278.05*      |
| DLP_17   | 105 | 3   | 5363            | 5278.74         | 5326.71  | 2m50s  | 131  | 7               | 3m30s         | 5362.83*      |
| DLP_84   | 105 | 4   | 7228            | 7117.02         | 7142.28  | 2m02s  | 136  | 19              | 21m01s        | 7227.88*      |
| DLP_81   | 106 | 4   | 10687           | 10483.95        | 10521.23 | 3m06s  | 182  | 313             | 5h36m         | 10583.50*     |
| DLP_2B   | 107 | 6   | 8463            | 8300.92         | 8332.22  | 4m17s  | 37   | 1639            | >60h          | 8463.00       |
| DLP_07   | 108 | 4   | 8090            | 8009.35         | 8049.38  | 3m51s  | 104  | 19              | 12m07s        | 8071.97*      |
| DLP_87   | 108 | 4   | 3754            | 3658.33         | 3692.55  | 6m32s  | 236  | 7               | 29m51s        | 3753.87*      |
| DLP_47   | 111 | 5   | 16157           | 15971.69        | 16123.03 | 3m54s  | 250  | 5               | 5m49s         | 16156.12*     |
| DLP_48   | 111 | 5   | 21310           | 21041.94        | 21228.34 | 19m51s | 321  | 7               | 28m25s        | 21257.38*     |
| DLP_61   | 111 | 3   | 7293            | 6997.61         | 7027.77  | 3m15s  | 33   | 1435            | >60h          | 7293.00       |
| DLP_12   | 112 | 4   | 3544            | 3410.14         | 3410.14  | 1m53s  | 0    | 25              | 1h39m         | 3543.99*      |
| DLP_30   | 112 | 3   | 6314            | 6185.97         | 6207.60  | 4m11s  | 186  | 1489            | 31h29m        | 6278.62*      |
| DLP_2A   | 113 | 6   | 7794            | 7708.25         | 7793.16  | 1m42s  | 77   | 1               | 1m42s         | 7793.16*      |
| DLP_53   | 115 | 3   | 6435            | 6281.51         | 6376.47  | 12m26s | 209  | 31              | 2h14m         | 6434.83*      |
| DLP_05   | 116 | 5   | 10877           | 10764.90        | 10869.04 | 29s    | 30   | 1               | 29s           | 10869.04*     |
| DLP_13   | 119 | 5   | 6697            | 6618.19         | 6649.75  | 5m20s  | 160  | 1261            | >60h          | 6696.43       |
| DLP_06   | 121 | 8   | 11689           | 11618.62        | 11682.98 | 2m37s  | 53   | 1               | 2m37s         | 11682.98*     |
| DLP_03   | 124 | 4   | 10710           | 10635.69        | 10669.77 | 55s    | 106  | 5               | 1m13s         | 10709.66*     |
| DLP_83   | 124 | 4   | 10020           | 9871.11         | 9899.78  | 2m33s  | 127  | 59              | 51m57s        | 10001.80*     |
| DLP_68   | 125 | 4   | 8971            | 8799.96         | 8852.89  | 5m39s  | 192  | 89              | 3h00m         | 8889.03*      |
| DLP_74   | 125 | 5   | 11587           | 11543.40        | 11563.64 | 41s    | 78   | 7               | 4m18s         | 11586.58*     |
| DLP_21   | 126 | 3   | 5140            | 5079.13         | 5110.52  | 8m11s  | 289  | 11              | 25m05s        | 5139.84*      |
| DLP_26   | 126 | 5   | 6434            | 6352.66         | 6382.52  | 6m00s  | 230  | 453             | 10h10m        | 6406.16*      |
| DLP_88   | 127 | 5   | 12389           | 12328.90        | 12385.74 | 29s    | 25   | 1               | 29s           | 12385.74*     |
| DLP_16   | 129 | 6   | 4157            | 4000.74         | 4006.42  | 4m33s  | 16   | 1573            | >60h          | 4157.00       |
| DLP_51   | 129 | 3   | 7722            | 7628.81         | 7666.22  | 10m11s | 123  | 3               | 29m17s        | 7721.47*      |
| DLP_31   | 131 | 8   | 4092            | 4045.03         | 4083.80  | 15m20s | 284  | 5               | 18m24s        | 4091.52*      |
| DLP_40   | 132 | 5   | 11119           | 10974.62        | 11015.52 | 2m32s  | 160  | 317             | 2h59m         | 11056.13*     |
| DLP_89   | 134 | 5   | 7087            | 6982.53         | 7023.43  | 4m11s  | 239  | 1027            | >60h          | 7087.00       |
| DLP_41   | 135 | 7   | 7598            | 7444.36         | 7444.36  | 4m48s  | 0    | 3305            | >60h          | 7598.00       |
| DLP_34   | 136 | 6   | 5748            | 5700.07         | 5727.33  | 7m35s  | 306  | 27              | 1h10m         | 5739.02*      |
| DLP_60   | 137 | 4   | 17037           | 16768.33        | 16934.97 | 5m40s  | 285  | 37              | 44m38s        | 17012.42*     |
| DLP_73   | 137 | 5   | 10196           | 10138.46        | 10174.15 | 57s    | 88   | 3               | 2m07s         | 10195.33*     |
| DLP_28   | 141 | 5   | 5531            | 5478.74         | 5499.59  | 4m24s  | 208  | 4705            | >60h          | 5525.90       |
| DLP_25   | 143 | 6   | 7207            | 7030.07         | 7042.25  | 5m46s  | 100  | 959             | >60h          | 7207.00       |
| DLP_85   | 146 | 4   | 8774            | 8690.09         | 8726.51  | 7m27s  | 295  | 111             | 2h40m         | 8763.90*      |
| DLP_79   | 147 | 4   | 7260            | 7132.58         | 7165.36  | 8m22s  | 187  | 21              | 1h13m         | 7257.97*      |
| DLP_66   | 150 | 4   | 12784           | 12484.59        | 12587.01 | 8m31s  | 104  | 999             | >60h          | 12776.24      |

Table 19: Detailed results for Duhamel et al. HFVRP instances with 101–150 customers

| Instance | $n$ | $m$ | Initial<br>$UB$ | Robust<br>bound | Root     |       |      | Nodes<br>number | Total<br>time | Final<br>$UB$ |
|----------|-----|-----|-----------------|-----------------|----------|-------|------|-----------------|---------------|---------------|
|          |     |     |                 |                 | bound    | time  | #R1C |                 |               |               |
| DLP_69   | 152 | 4   | 9148            | 9003.97         | 9086.90  | 7m52s | 335  | 147             | 3h36m         | 9127.16*      |
| DLP_76   | 152 | 8   | 11995           | 11900.23        | 11933.72 | 5m28s | 212  | 1195            | >60h          | 11994.22      |
| DLP_56   | 153 | 4   | 31031           | 30571.34        | 30764.30 | 8m26s | 250  | 1591            | 58h50m        | 30905.95*     |
| DLP_86   | 153 | 5   | 9028            | 8935.26         | 8957.90  | 8m23s | 274  | 249             | 8h45m         | 9020.63*      |
| DLP_37   | 161 | 5   | 6851            | 6751.15         | 6787.92  | 7m57s | 354  | 2017            | >60h          | 6838.72       |
| DLP_64   | 161 | 3   | 17136           | 16552.72        | 16552.72 | 6m38s | 25   | 995             | >60h          | 17135.16      |
| DLP_24   | 163 | 4   | 9102            | 8990.07         | 8990.07  | 3m26s | 0    | 1907            | >60h          | 9102.00       |
| DLP_57   | 163 | 4   | 44782           | 44302.32        | 44409.19 | 8m53s | 194  | 1565            | >60h          | 44782.00      |

|        |     |   |       |          |          |        |     |      |        |                  |
|--------|-----|---|-------|----------|----------|--------|-----|------|--------|------------------|
| DLP_29 | 164 | 4 | 9143  | 9044.54  | 9078.84  | 9m59s  | 182 | 43   | 2h18m  | <u>9132.03*</u>  |
| DLP_09 | 167 | 5 | 7604  | 7543.04  | 7563.84  | 12m52s | 274 | 135  | 2h16m  | <u>7599.72*</u>  |
| DLP_35 | 168 | 6 | 9556  | 9492.98  | 9521.16  | 2m55s  | 114 | 3    | 3m17s  | <u>9522.45*</u>  |
| DLP_45 | 170 | 3 | 10477 | 10294.91 | 10343.43 | 8m34s  | 124 | 929  | >60h   | 10477.00         |
| DLP_80 | 171 | 3 | 6817  | 6712.75  | 6716.88  | 8m39s  | 29  | 219  | 13h07m | 6816.89*         |
| DLP_44 | 172 | 3 | 12192 | 11895.60 | 11895.60 | 12m31s | 19  | 1187 | >60h   | 12192.00         |
| DLP_54 | 172 | 4 | 10352 | 10089.37 | 10089.37 | 7m45s  | 21  | 1323 | >60h   | 10352.00         |
| DLP_67 | 172 | 5 | 10885 | 10604.14 | 10662.94 | 9m53s  | 233 | 325  | 23h44m | <u>10772.81*</u> |
| DLP_63 | 174 | 5 | 19952 | 19670.12 | 19799.92 | 8m54s  | 108 | 97   | 5h24m  | <u>19890.65*</u> |
| DLP_14 | 176 | 4 | 5645  | 5511.85  | 5511.85  | 4m37s  | 0   | 1023 | >60h   | <u>5639.98</u>   |
| DLP_42 | 178 | 7 | 10818 | 10615.08 | 10615.08 | 7m00s  | 0   | 889  | >60h   | <u>10805.94</u>  |
| DLP_02 | 181 | 4 | 11676 | 11603.82 | 11632.01 | 4m27s  | 104 | 25   | 9m34s  | <u>11649.81*</u> |
| DLP_04 | 183 | 4 | 10749 | 10582.45 | 10673.39 | 9m41s  | 277 | 985  | 13h53m | <u>10714.84*</u> |
| DLP_95 | 183 | 2 | 6176  | 6100.98  | 6119.06  | 6m53s  | 290 | 1709 | >60h   | <u>6170.20</u>   |
| DLP_71 | 186 | 3 | 9835  | 9711.77  | 9771.86  | 10m30s | 292 | 87   | 4h08m  | <u>9798.06*</u>  |
| DLP_72 | 186 | 4 | 5904  | 5780.39  | 5831.66  | 9m35s  | 322 | 365  | 31h31m | <u>5870.43*</u>  |
| DLP_50 | 187 | 6 | 12371 | 12035.29 | 12035.29 | 9m56s  | 0   | 1521 | >60h   | 12371.00         |
| DLP_15 | 188 | 7 | 8221  | 8083.44  | 8083.44  | 3m27s  | 0   | 873  | >60h   | 8221.00          |
| DLP_33 | 189 | 7 | 9411  | 9248.07  | 9283.05  | 9m51s  | 135 | 1129 | >60h   | <u>9333.39</u>   |
| DLP_77 | 190 | 3 | 6917  | 6821.36  | 6826.04  | 7m49s  | 10  | 1215 | >60h   | 6917.00          |
| DLP_78 | 190 | 4 | 7036  | 6899.96  | 6899.96  | 6m40s  | 0   | 1099 | >60h   | 7036.00          |
| DLP_59 | 193 | 6 | 14283 | 13786.96 | 13786.96 | 23m42s | 0   | 737  | >60h   | 14283.00         |
| DLP_91 | 196 | 4 | 6375  | 6228.90  | 6244.50  | 10m26s | 157 | 1167 | >60h   | <u>6348.36</u>   |

Table 20: Detailed results for Duhamel et al. HFVRP instances with 151–200 customers

| Instance | $n$ | $m$ | Initial<br>$UB$ | Robust<br>bound | Root     |        |      | Nodes<br>number | Total<br>time | Final<br>$UB$   |
|----------|-----|-----|-----------------|-----------------|----------|--------|------|-----------------|---------------|-----------------|
|          |     |     |                 |                 | bound    | time   | #RIC |                 |               |                 |
| DLP_23   | 203 | 4   | 7742            | 7590.28         | 7603.76  | 8m46s  | 70   | 1043            | >60h          | 7742.00         |
| DLP_38   | 205 | 5   | 11195           | 11048.66        | 11092.13 | 14m28s | 375  | 869             | >60h          | 11195.00        |
| DLP_58   | 220 | 6   | 23371           | 22800.97        | 22800.97 | 36m42s | 10   | 969             | >60h          | 23371.00        |
| DLP_27   | 220 | 5   | 8423            | 8315.95         | 8343.41  | 10m15s | 174  | 687             | >60h          | 8423.00         |
| DLP_65   | 223 | 3   | 13044           | 12648.64        | 12648.64 | 41m17s | 24   | 657             | >60h          | 13044.00        |
| DLP_19   | 224 | 5   | 11687           | 11503.00        | 11526.84 | 8m25s  | 98   | 1053            | >60h          | 11687.00        |
| DLP_62   | 225 | 5   | 23011           | 22594.36        | 22645.25 | 13m36s | 47   | 1047            | >60h          | <u>22987.90</u> |
| DLP_22   | 239 | 2   | 13069           | 12923.02        | 12956.02 | 13m12s | 357  | 1193            | >60h          | <u>13050.00</u> |
| DLP_32   | 244 | 8   | 9383            | 9205.76         | 9235.38  | 14m29s | 108  | 695             | >60h          | 9383.00         |
| DLP_49   | 246 | 8   | 16182           | 15681.80        | 15681.80 | 15m27s | 0    | 735             | >60h          | 16182.00        |
| DLP_46   | 250 | 5   | 24567           | 23856.71        | 23856.71 | 14m14s | 21   | 913             | >60h          | 24567.00        |
| DLP_18   | 256 | 5   | 9653            | 9491.55         | 9547.80  | 22m29s | 519  | 1159            | >60h          | <u>9649.05</u>  |

Table 21: Detailed results for Duhamel et al. HFVRP instances with more than 200 customers

## References

- Contardo C, Martinelli R, 2014 *A new exact algorithm for the multi-depot vehicle routing problem under capacity and route length constraints*. *Discrete Optimization* 12:129 – 146.
- Dell’Amico M, Díaz JCD, Hasle G, Iori M, 2016 *An adaptive iterated local search for the mixed capacitated general routing problem*. *Transportation Science* 50(4):1223–1238.

- Escobar JW, Linfati R, Toth P, Baldoquin MG, 2014 *A hybrid granular tabu search algorithm for the multi-depot vehicle routing problem. Journal of Heuristics* 20(5):483–509.
- Kallehauge B, Larsen J, Madsen OB, 2006 *Lagrangian duality applied to the vehicle routing problem with time windows. Computers and Operations Research* 33(5):1464 – 1487.
- Pecin D, Contardo C, Desaulniers G, Uchoa E, 2017 *New enhancements for the exact solution of the vehicle routing problem with time windows. INFORMS Journal on Computing* 29(3):489–502.
